# Supplementary material for: Pressure-engineered migration bottlenecks and non-monotonic ionic conduction in NASICON solid electrolytes
Source: Royal Society of Chemistry journal article supplement (doi:10.1039/d5ta07262j), 2025-11-28
Supplement: d5ta07262j1.pdf [file d5ta07262j1.pdf]

## Supporting Information

### Pressure-Engineered Migration Bottlenecks and Non-Monotonic Ionic Conduction in NASICON Solid Electrolytes

Qiaoxin Zhang,<sup>a</sup> Huacai Yan,<sup>\*a</sup> Mohan Jia,<sup>a</sup> Dequan Jiang,<sup>a</sup> Ke Liu,<sup>b</sup> Run Yu,<sup>b</sup> Yifeng An,<sup>a</sup> Tianyao Pei,<sup>b</sup>  
Yonggang Wang<sup>\*a</sup>

<sup>a</sup> *State Key Laboratory of Advanced Waterproof Materials, School of Materials Science and Engineering, Peking University, Beijing 100871, China.*

<sup>b</sup> *Center for High Pressure Science and Technology Advanced Research (HPSTAR), Beijing 100193, China.*

\*Email address: [yanhc@pku.edu.cn](mailto:yanhc@pku.edu.cn) (Huacai Yan);

[ygw@pku.edu.cn](mailto:ygw@pku.edu.cn) (Yonggang Wang)

### ***In situ* HP EIS measurements**

A symmetric diamond anvil cell (DAC) with 400  $\mu\text{m}$  culets was employed for *in situ* HP EIS measurements. The sample chamber was prepared by pre-indenting a stainless steel gasket to 40  $\mu\text{m}$  in thickness and laser-drilling a 250  $\mu\text{m}$  diameter hole at its center. Insulating layers were fabricated by compacting epoxy-bonded cubic boron nitride (*c*-BN) powder into the gasket hole, followed by laser milling a sample chamber with 160  $\mu\text{m}$  in diameter and 50  $\mu\text{m}$  in thickness. A parallel-plate capacitor configuration with platinum (Pt) electrodes was used for measurements<sup>1, 2</sup>. Pressure was calibrated via ruby fluorescence. *In situ* HP EIS measurements were performed using a Metrohm Multi Autolab M204 electrochemical workstation, applying a 0.1 mV bias voltage across a frequency range of  $10^{-1}$  to  $10^6$  Hz.

### ***In situ* HP XRD and Raman spectra measurements**

The same size DAC was utilized to measure the *in situ* HP XRD and Raman spectra. For both measurements, a stainless steel gasket was pressed to 40  $\mu\text{m}$  thickness and drilled with a 250  $\mu\text{m}$  diameter hole to serve as the sample chamber. Silicone oil served as the pressure transmitting medium (PTM) during the experiments. For the *in situ* HP XRD measurements, data were collected at room temperature by a focused monochromatic X-ray beam (0.6199 Å) at beamline station BL15U1 of the Shanghai Synchrotron Radiation Facility (SSRF). Pressure was calibrated via ruby fluorescence during compression. The data were collected using a MAR345 image plate detector, with  $\text{CeO}_2$  as the calibration standard. The obtained two-dimensional XRD patterns were integrated using Dioptas software<sup>3</sup>, and lattice parameters at different pressures were refined by Fullprof<sup>4</sup>. For the *in situ* Raman spectra, measurements were conducted at room temperature by a Renishaw inVia reflex micro-Raman spectroscope with 532 nm laser excitation, and the Raman signal of Si was used as the calibrated standard.

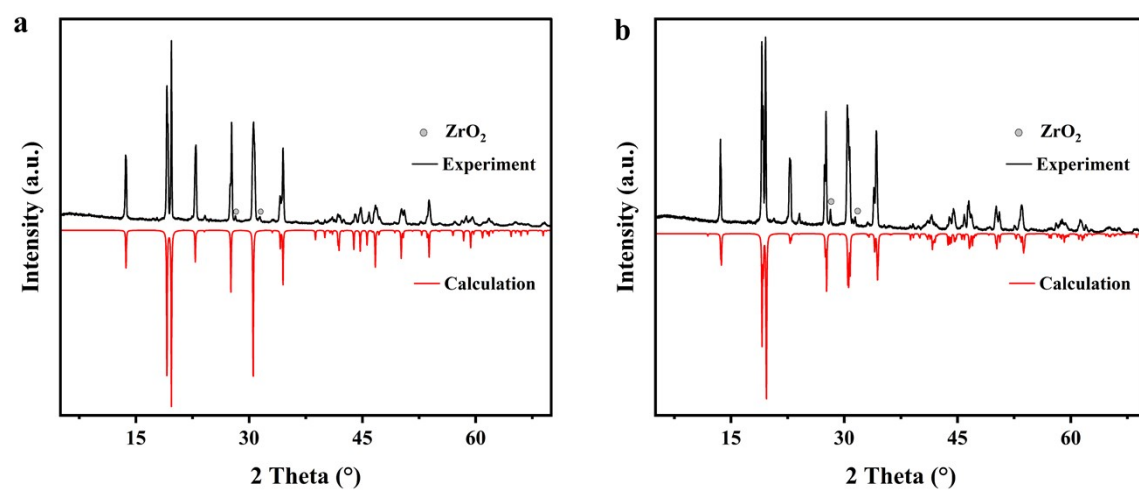

**Fig. S1** Powder XRD pattern for (a) NZSP-R-3c and (b) NZSP-C2/c.

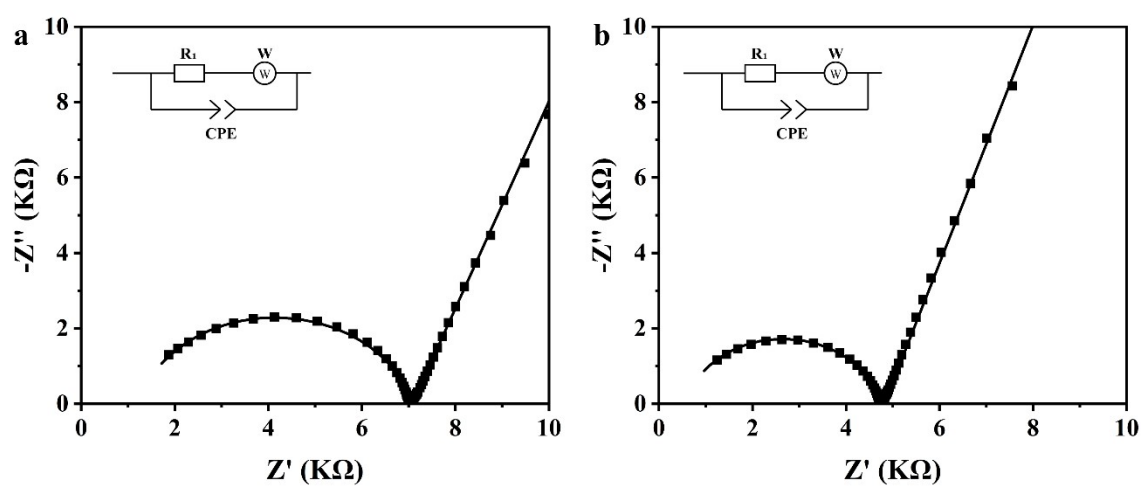

**Fig. S2** EIS of the two ceramic pellets. Nyquist plots, fitting curves for (a) NZSP-R-3c and (b) NZSP-C2/c under ambient conditions. Inset: Equivalent circuit.

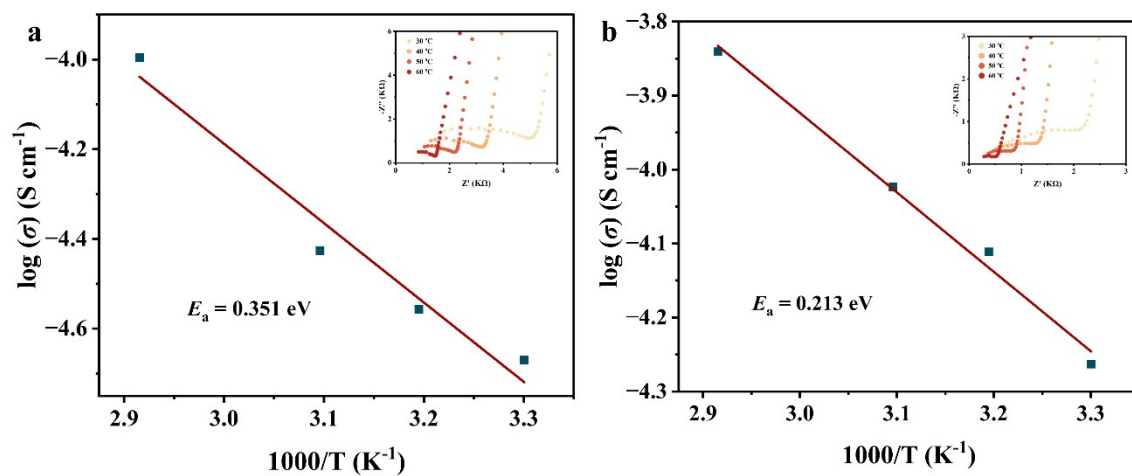

**Fig. S3** Arrhenius plots of ionic conductivity for (a) NZSP-R-3c and (b) NZSP-C2/c from 30 °C-60 °C under ambient conditions. Insets: Nyquist plots from 30 °C-60 °C.

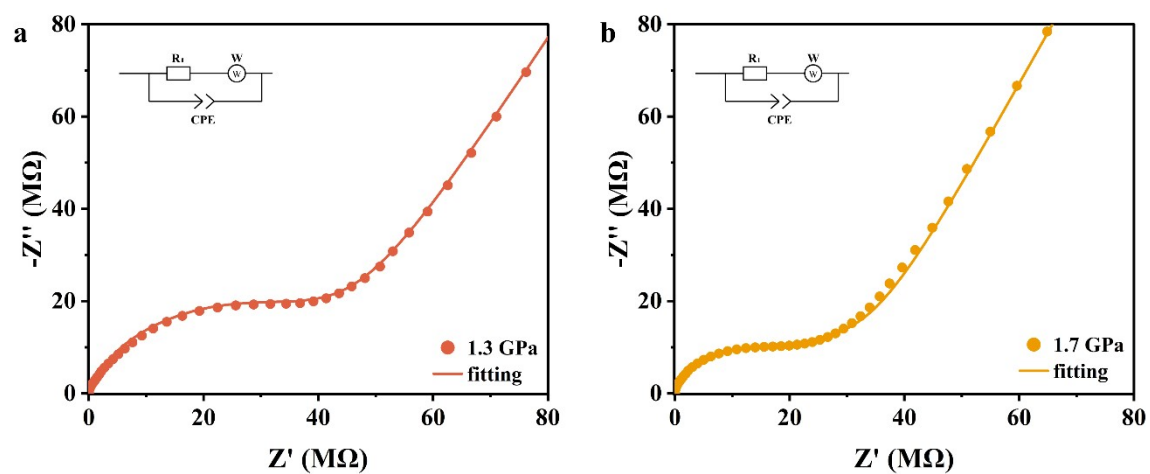

**Fig. S4** Representative EIS with Nyquist plot analysis. Nyquist plots with fitting curves for (a) NZSP-R-3c at 1.3 GPa and (b) NZSP-C2/c at 1.7 GPa. Inset: Equivalent circuit.

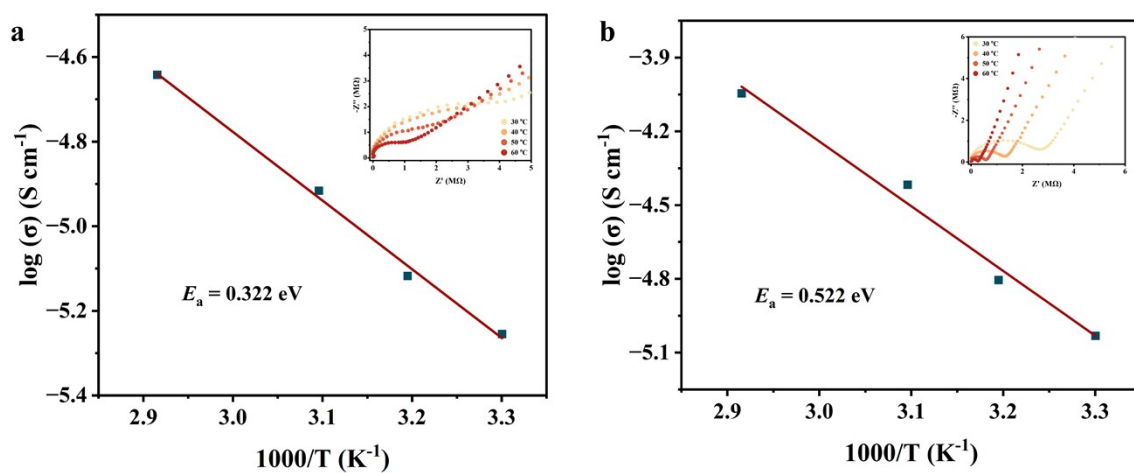

**Fig. S5** Arrhenius plots of ionic conductivity for NZSP-C2/c from 30 °C-60 °C at (a) 0.2 GPa and (b) release to 0.4 GPa. Insets: Nyquist plots of NZSP-C2/c from 30 °C-60 °C.

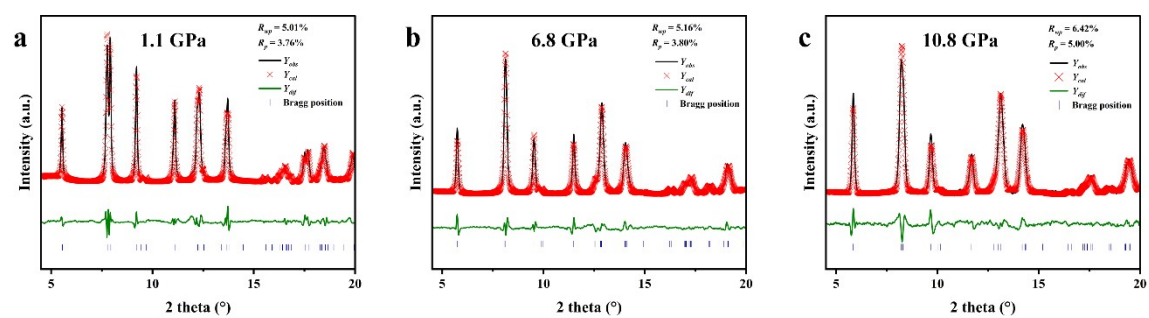

**Fig. S6** LeBail fittings for the XRD patterns of NZSP-R-3c at selected pressures.



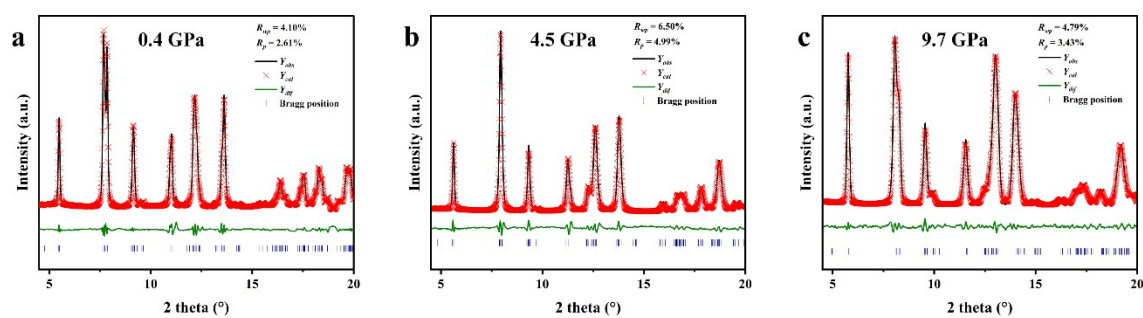

**Fig. S7** LeBail fittings for the XRD patterns for NZSP-C2/c at selected pressures.

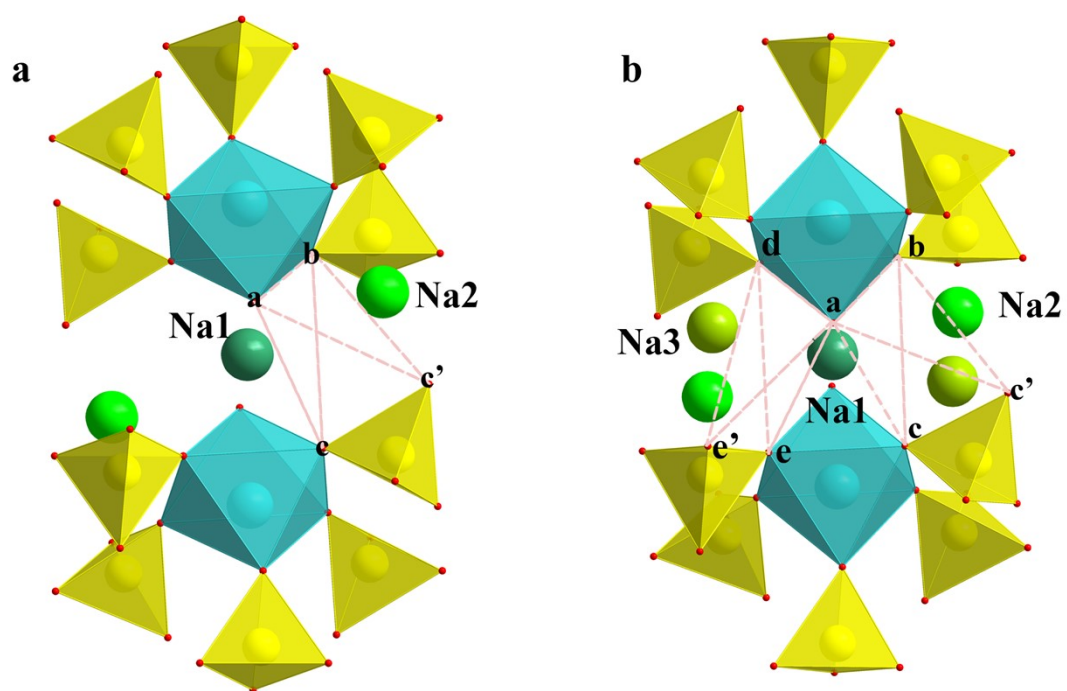

**Fig. S8** Local structural geometries with bottlenecks extracted from (a) NZSP-*R*-3*c* and (b) NZSP-*C*2/*c*.

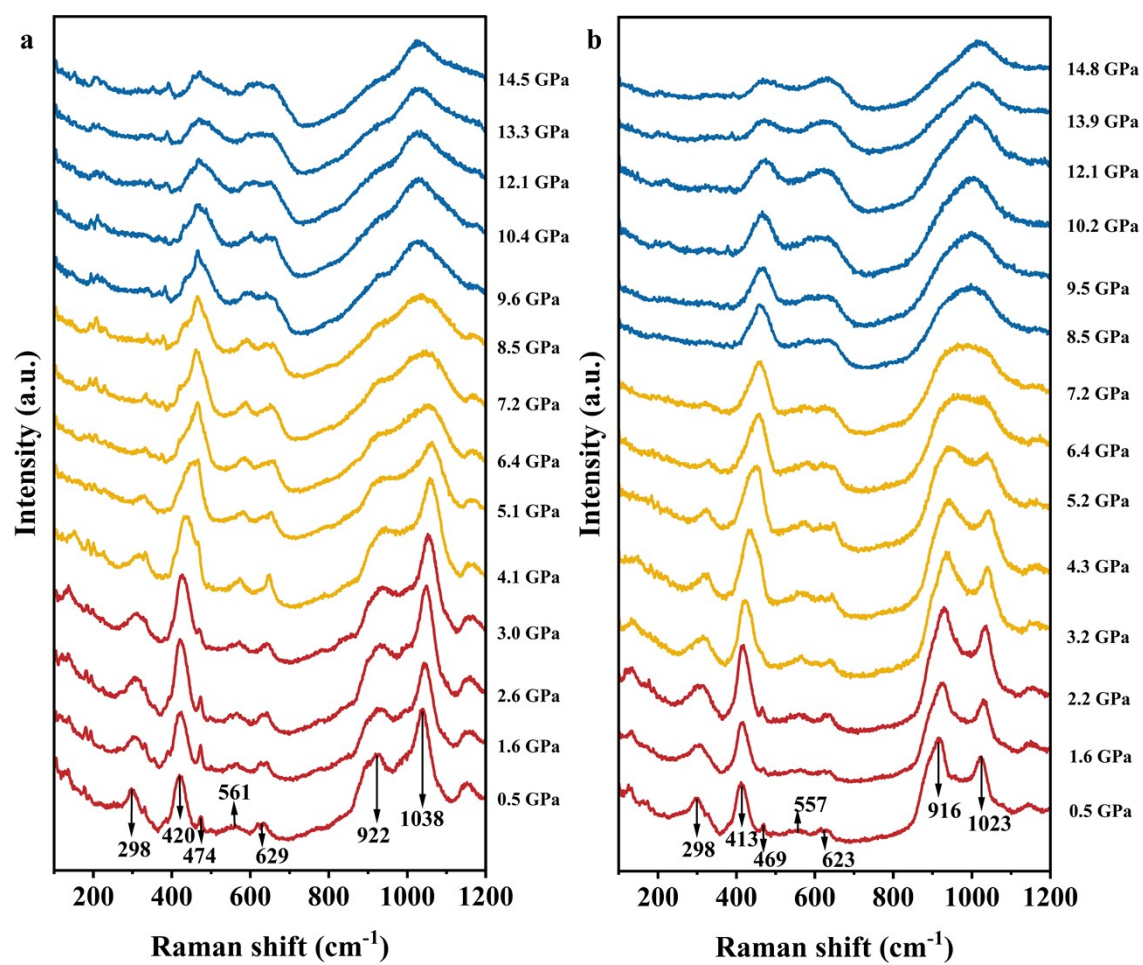

**Fig. S9** *In situ* HP Raman spectra at room temperature for (a) NZSP-R-3c and (b) NZSP-C2/c.

**Table S1.** Pressure effects on bottleneck dimensions extracted from NZSP-*R-3c*.

|                                         | 0 GPa  | 3 GPa  | 6 GPa  |                                         | 0 GPa  | 3 GPa  | 6 GPa  |
|-----------------------------------------|--------|--------|--------|-----------------------------------------|--------|--------|--------|
| ab (Å)<br>(Triangle A )                 | 2.877  | 2.822  | 2.778  | ab (Å)<br>(Triangle B )                 | 2.877  | 2.822  | 2.778  |
| bc (Å)<br>(Triangle A )                 | 3.992  | 3.894  | 3.805  | bc' (Å)<br>(Triangle B )                | 3.66   | 3.593  | 3.54   |
| ac (Å)<br>(Triangle A )                 | 3.992  | 3.894  | 3.805  | ac' (Å)<br>(Triangle B )                | 4.308  | 4.243  | 4.188  |
| $\angle abc$ (° )<br>(Triangle A )      | 68.878 | 68.753 | 68.59  | $\angle abc'$ (° )<br>(Triangle B )     | 81.512 | 81.878 | 82.105 |
| $\angle bac$ (° )<br>(Triangle A )      | 68.878 | 68.753 | 68.59  | $\angle bac'$ (° )<br>(Triangle B )     | 57.159 | 56.944 | 56.826 |
| $\angle bca$ (° )<br>(Triangle A )      | 42.243 | 42.493 | 42.821 | $\angle bc'a$ (° )<br>(Triangle B )     | 41.329 | 41.178 | 41.069 |
| Area (Å <sup>2</sup> )<br>(Triangle A ) | 5.353  | 5.12   | 4.922  | Area (Å <sup>2</sup> )<br>(Triangle B ) | 5.205  | 5.015  | 4.865  |

**Table S2.** Pressure effects on bottleneck dimensions extracted from NZSP-C2/c.

|                                         | 0 GPa  | 3 GPa  | 6 GPa  |                                         | 0 GPa  | 3 GPa  | 6 GPa  |
|-----------------------------------------|--------|--------|--------|-----------------------------------------|--------|--------|--------|
| ab (Å)<br>(Triangle A )                 | 2.874  | 2.820  | 2.776  | ab (Å)<br>(Triangle B )                 | 2.874  | 2.820  | 2.776  |
| bc (Å)<br>(Triangle A )                 | 4.018  | 3.901  | 3.8    | bc' (Å)<br>(Triangle B )                | 3.712  | 3.638  | 3.578  |
| ac (Å)<br>(Triangle A )                 | 4.021  | 3.902  | 3.801  | ac' (Å)<br>(Triangle B )                | 4.343  | 4.272  | 4.212  |
| $\angle abc$ (° )<br>(Triangle A )      | 69.097 | 68.829 | 68.583 | $\angle abc'$ (° )<br>(Triangle B )     | 81.446 | 81.762 | 81.979 |
| $\angle bac$ (° )<br>(Triangle A )      | 69.001 | 68.807 | 68.581 | $\angle bac'$ (° )<br>(Triangle B )     | 57.680 | 57.446 | 57.281 |
| $\angle bca$ (° )<br>(Triangle A )      | 41.901 | 42.364 | 42.839 | $\angle bc'a$ (° )<br>(Triangle B )     | 40.874 | 40.792 | 40.74  |
| Area (Å <sup>2</sup> )<br>(Triangle A ) | 5.396  | 5.132  | 4.91   | Area (Å <sup>2</sup> )<br>(Triangle B ) | 5.277  | 5.075  | 4.917  |
| ad (Å)<br>(Triangle C )                 | 2.872  | 2.820  | 2.776  | ad (Å)<br>(Triangle D )                 | 2.872  | 2.820  | 2.776  |
| de (Å)<br>(Triangle C )                 | 4.022  | 3.903  | 3.801  | de' (Å)<br>(Triangle D )                | 3.715  | 3.64   | 3.579  |
| ae (Å)<br>(Triangle C )                 | 4.018  | 3.901  | 3.80   | ae' (Å)<br>(Triangle D )                | 4.342  | 4.272  | 4.212  |
| $\angle dae$ (° )<br>(Triangle C )      | 68.995 | 68.793 | 68.574 | $\angle dae'$ (° )<br>(Triangle D )     | 81.377 | 81.737 | 81.971 |
| $\angle ade$ (° )<br>(Triangle C )      | 69.115 | 68.849 | 68.588 | $\angle ade'$ (° )<br>(Triangle D )     | 57.785 | 57.48  | 57.291 |
| $\angle dea$ (° )<br>(Triangle C )      | 41.85  | 42.358 | 42.838 | $\angle de'a$ (° )<br>(Triangle D )     | 40.838 | 40.783 | 40.738 |
| Area (Å <sup>2</sup> )<br>(Triangle C ) | 5.392  | 5.132  | 4.911  | Area (Å <sup>2</sup> )<br>(Triangle D ) | 5.274  | 5.079  | 4.919  |

**Table S3.** Raman modes in NZSP-*R-3c* and NZSP-*C2/c*.

| Raman shift in<br>NZSP- <i>R-3c</i> | Raman shift in NZSP-<br><i>C2/c</i> . | Group <sup>5</sup>                                 |
|-------------------------------------|---------------------------------------|----------------------------------------------------|
| 1038                                | 1023                                  | P-O asymmetric stretch mode ( $\nu_3$ (F2))        |
| 922                                 | 916                                   | Si-O asymmetric stretch mode ( $\nu_3$ (F2))       |
| 629                                 | 623                                   | P-O asymmetric bending vibrations ( $\nu_4$ (F2))  |
| 561                                 | 557                                   | Si-O asymmetric bending vibrations ( $\nu_4$ (F2)) |
| 474                                 | 469                                   | P-O symmetric bending vibrations ( $\nu_2$ (F2))   |
| 420                                 | 413                                   | P-O symmetric bending vibration ( $\nu_2$ (E))     |
| 298                                 | 298                                   | Si-O symmetric bending vibration ( $\nu_2$ (E))    |

1. Y. Wang, Y. Han, C. Gao, Y. Ma, C. Liu, G. Peng, B. Wu, B. Liu, T. Hu, X. Cui, W. Ren, Y. Li, N. Su, H. Liu and G. Zou, *Rev. Sci. Instrum.*, 2010, **81**, 013904.
2. Q. Wang, C. Liu, Y. Han, C. Gao and Y. Ma, *Rev. Sci. Instrum.*, 2016, **87**, 123904.
3. C. Prescher and V. B. Prakapenka, *High Pressure Res.*, 2015, **35**, 223-230.
4. J. Rodriguezcarvajal, *Phys. B*, 1993, **192**, 55-69.
5. K. Nakamoto, *Infrared and Raman Spectra of Inorganic and Coordination Compounds*, John Wiley & Sons, Ltd, 2006.
